# Supplementary material for: Solid-state functionalization of graphene with amino acids toward water-dispersity: implications on a composite with polyaniline and its characteristics as a supercapacitor electrode material
Source: Royal Society of Chemistry journal article supplement (doi:10.1039/c4ta01345j), 2014-06-06
Supplement: c4ta01345j1.pdf [file c4ta01345j1.pdf]

**Solid-state functionalization of graphene with amino acids toward  
water-dispersity: Implications on a composite with polyaniline and  
its characteristics as a supercapacitor electrode material**

Gansukh Erdenedelger,<sup>a†</sup> Taemin Lee,<sup>b†</sup> Trung Dung Dao,<sup>a†</sup> Joon Soo Kim,<sup>c</sup> Byeong-Su  
Kim,<sup>\*b</sup> Han Mo Jeong<sup>\*a</sup>

*<sup>a</sup>Department of Chemistry, Energy Harvest-Storage Research Center, University of Ulsan,  
Ulsan 680-749, Korea.*

*E-mail: hmjeong@mail.ulsan.ac.kr; Tel: +82-52-259-2343*

*<sup>b</sup>Department of Chemistry and Department of Energy Engineering, Ulsan National Institute of  
Science and Technology (UNIST), Ulsan 689-798, Korea.*

*Technology (UNIST), Ulsan 689-798, Korea.*

*E-mail: bskim19@unist.ac.kr; Tel: +82-52-217-2923*

*<sup>c</sup>Korea Institute of Energy Research (KIER), Daejeon 305-343, Korea.*

†These authors contributed equally to this paper.

(a)

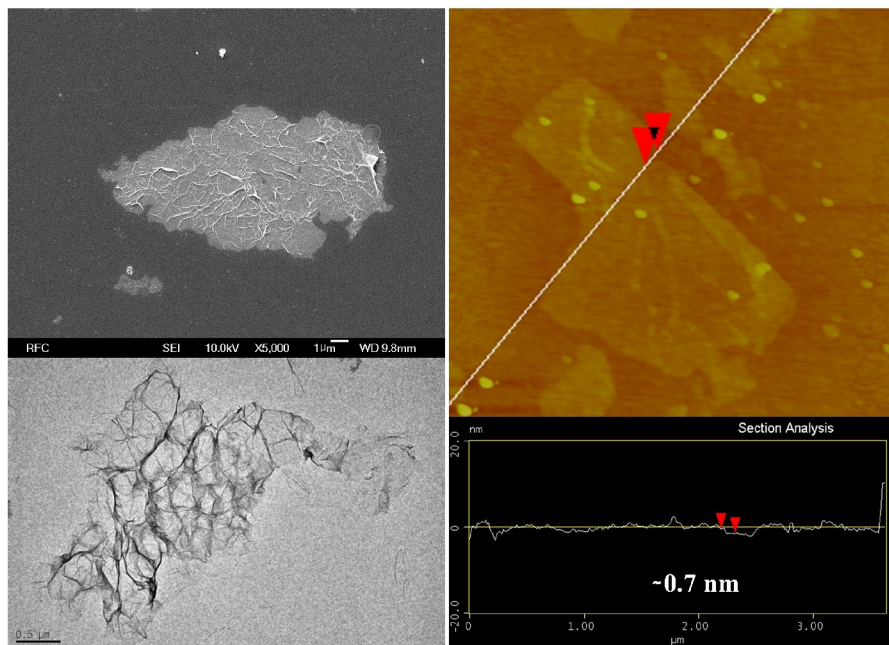

(b)

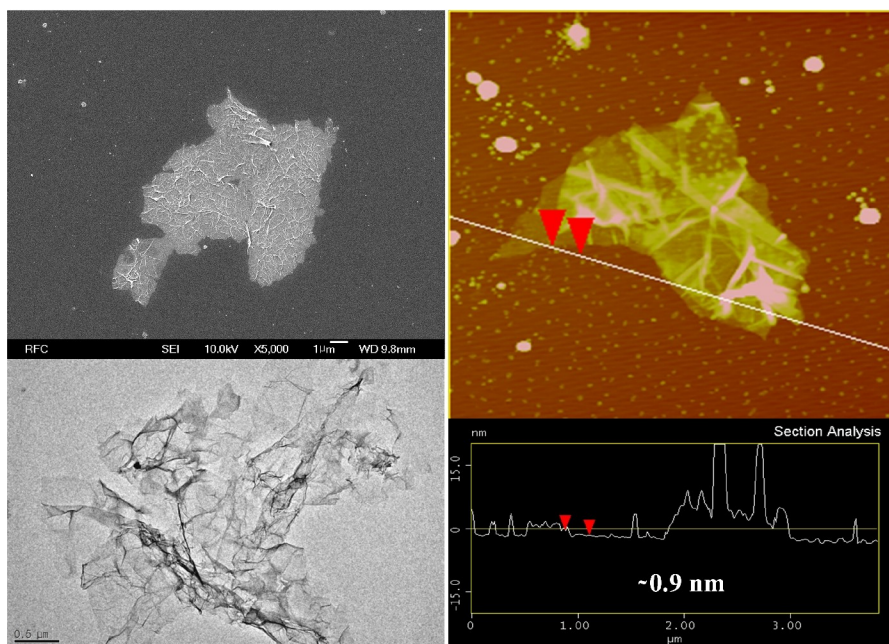

Fig. S1 SEM, TEM, AFM images of (a) TRG and (b) C-TRG

**Table S1.** List of electrochemical capacitance values of PANI/GO composite electrodes measured with a three-electrode setup from recent literatures

| System                        | Specific Capacitance | Measurement Condition                       | Reference                                                             |
|-------------------------------|----------------------|---------------------------------------------|-----------------------------------------------------------------------|
| <i>Simple mixing</i>          | <b>290.2 F/g</b>     | <b>Discharge current density at 0.5 A/g</b> | <b>Our study</b>                                                      |
|                               | 210 F/g              | Discharge current density at 0.3 A/g        | Gaoquan Shi et al, <i>ACS Nano</i> <b>2010</b> , 4, 1963              |
| <i>In-situ Polymerization</i> | 260 F/g              | Discharge current density at 0.5 A/g        | Jishan Wu et al, <i>Chem. Mater.</i> <b>2010</b> , 22, 1392           |
|                               | 555 F/g              | Discharge current density at 0.2 A/g        | Zhixiang Wei et al, <i>ACS Nano</i> <b>2010</b> , 4, 5019             |
|                               | 640 F/g              | Discharge current density at 0.1 A/g        | Wei Huang et al, <i>Adv. Funct. Mater.</i> <b>2011</b> , 21, 2989     |
|                               | 250 F/g              | CV scan rate at 100 mV/s                    | Jong-Beom Baek et al, <i>ACS Nano</i> <b>2012</b> , 6, 1715           |
|                               | 349 F/g              | Discharge current density at 0.5 A/g        | X. S. Zhao et al, <i>J. Phys. Chem. C</i> <b>2012</b> , 116, 5420     |
|                               | 288 F/g              | Discharge current density at 1 A/g          | H. N. Alshareef et al, <i>Nanoscale</i> , <b>2013</b> , 5, 4134       |
|                               | 1024 F/g             | CV scan rate at 10 mV/s                     | SeongChan Jun et al, <i>J. Mater. Chem. A</i> , <b>2014</b> , 2, 4989 |
| <i>Electro polymerization</i> | 233 F/g              | CV scan rate at 20 mV/s                     | Hui-Ming Cheng et al, <i>ACS Nano</i> <b>2009</b> , 3, 1745           |
